# Supplementary material for: Convective rainfall drives behavioral shifts across multiple foraging scales in breeding seabirds
Source: Research Square preprint supplement (doi:10.21203/rs.3.rs-6970356/v1), 2025-07-14
Supplement: Supplementary file 1 [file 38d038bc1dc7598686742eea.docx]

**Supplemental Materials**

Convective rainfall drives behavioral shifts across multiple foraging scales in breeding seabirds

Takeda W*, Koyama S*, Goto Y*, Yoda K*

*Graduate School of Environmental Studies, Nagoya University, Furo-cho, Chikusa-ku, Nagoya, Japan, 464-8601

Supplementary Table 1. The number of parent birds equipped with GPS loggers each year from 2011 to 2024

| Year | 2011 | 2012 | 2013 | 2014 | 2015 | 2016 | 2017 |
| --- | --- | --- | --- | --- | --- | --- | --- |
| N | 44 | 59 | 42 | 39 | 42 | 58 | 70 |
| Year | 2018 | 2019 | 2020 | 2021 | 2022 | 2023 | 2024 |
| N | 55 | 54 | 38 | 49 | 43 | 36 | 35 |

N represents the number of individuals.

Supplementary Table 2. Correlation matrix of climatic parameters used in each model.

| Fine-Scale Behavioral States | C | CR | LSR | WS |
| --- | --- | --- | --- | --- |
| C | 1 | 0.18 | 0.18 | -0.01 |
| CR |  | 1 | 0.39 | 0.08 |
| LSR |  |  | 1 | 0.08 |
| WS |  |  |  | 1 |
| Meso-Scale Trip Parameters | C | CR | LSR | WS |
| C | 1 | 0.38 | 0.45 | 0.13 |
| CR |  | 1 | 0.62 | 0.19 |
| LSR |  |  | 1 | 0.22 |
| WS |  |  |  | 1 |
| Broad-Scale Behavioral Specialization | C | CR | LSR | WS |
| C | 1 | 0.34 | 0.33 | 0.09 |
| CR |  | 1 | 0.57 | 0.13 |
| LSR |  |  | 1 | 0.44 |
| WS |  |  |  | 1 |
| Chick Growth Rate | C | CR | LSR | WS |
| C | 1 | 0.69 | 0.57 | 0.63 |
| CR |  | 1 | 0.57 | 0.35 |
| LSR |  |  | 1 | 0.45 |
| WS |  |  |  | 1 |

Each value represents Pearson’s correlation coefficient. C: Cloud, CR: Convective Rainfall, LSR: Large-Scale Rainfall, TR: Total Rainfall, WS: Wind Speed

Supplementary Table 3. Estimated coefficients and 95% confidence intervals for each state transition probability, calculated from the best-fitting Hidden Markov Model (HMM) including cloud cover, convective rainfall, and wind speed as covariates. Covariates were considered to have a significant effect on state transitions when the confidence intervals did not include zero.

| Model | Transition | Estimate | Lower-95% CI | Upper-95% CI |
| --- | --- | --- | --- | --- |
| Cloud | **Travel -> Forage** | **-0.083** | **-0.132** | **-0.034** |
|  | Forage -> Travel | 0.008 | -0.043 | 0.058 |
|  | **Forage -> Rest** | **-0.061** | **-0.113** | **-0.009** |
|  | **Rest -> Forage** | **-0.052** | **-0.102** | **-0.002** |
| Convective Rain | **Travel -> Forage** | **0.071** | **0.021** | **0.121** |
|  | Forage -> Travel | 0.027 | -0.023 | 0.077 |
|  | **Forage -> Rest** | **-0.070** | **-0.129** | **-0.010** |
|  | Rest -> Forage | 0.021 | -0.038 | 0.080 |
| Wind Speed | Travel -> Forage | -0.004 | -0.011 | 0.004 |
|  | **Forage -> Travel** | **0.017** | **0.010** | **0.024** |
|  | Forage -> Rest | -0.007 | -0.015 | 0.001 |
|  | **Rest -> Forage** | **-0.026** | **-0.033** | **-0.018** |

CI means 95% confidence intervals. Bold indicates significant variables

Supplementary Table 4. Transition probability matrix of the best-fitting HMM. Each value represents the probability of transitioning to a different state or remaining in the same state from time t to time t + 1.

|  |  | t + 1 | | |
| --- | --- | --- | --- | --- |
|  |  | Travel | Forage | Rest |
| t | Travel | 0.88 | 0.08 | < 0.0001 |
| Forage | 0.12 | 0.84 | 0.12 |
| Rest | < 0.0001 | 0.09 | 0.88 |

Supplementary Fig. 1. Mean convective rainfall, mean large-scale rainfall (LSR), and proportion of LSR in offshore waters near breeding grounds during August and September. Values represent the mean total rainfall for August and September each year and the proportion of LSR relative to total rainfall.

Supplementary Fig. 2. Chick growth rate by year. The vertical axis indicates chick body mass, and the horizontal axis represents date (from August 19 to November 17). In all years, chick body mass peaked in October and declined thereafter, suggesting that parental provisioning rates decreased following this period. The dotted line marks September 30, and chick growth rates before this date were used in the analysis.

Supplementary Fig. 3. Histogram of step length and turning angle for foraging trips used in the best-fitting HMM including climatic covariates. The upper panel shows step length, and the lower panel shows turning angle. Colored solid lines indicate the distributions for each state classified by the HMM.

Supplementary Fig. 4. The blue hatched area enclosed by solid black lines represents the marine area corresponding to the 50% kernel utilization distribution of all foraging trips. A black cross indicate the location of breeding site, and red dots indicate the locations within this area where climate data used in the analysis were obtained.

Supplementary Fig. 5. Box plots of maximum distance and trip duration by year. The upper panel shows maximum distance, and the lower panel shows trip duration. Each point represents the value for a single foraging trip of each individual.

Supplementary Fig. 6. Histograms of step length and turning angle for foraging trips used in the HMM applied for IFSF estimation. The upper panel shows step length, and the lower panel shows turning angle. Colored solid lines indicate the distributions for each state classified by the HMM.
